# Supplementary material for: Potential SARS-CoV-2 Susceptibility of Cetaceans Stranded along the Italian Coastline
Source: MDPI journal article supplement (doi:10.3390/pathogens11101096), 2022-09-25
Supplement: s1 [file s1]

## Supplementary material

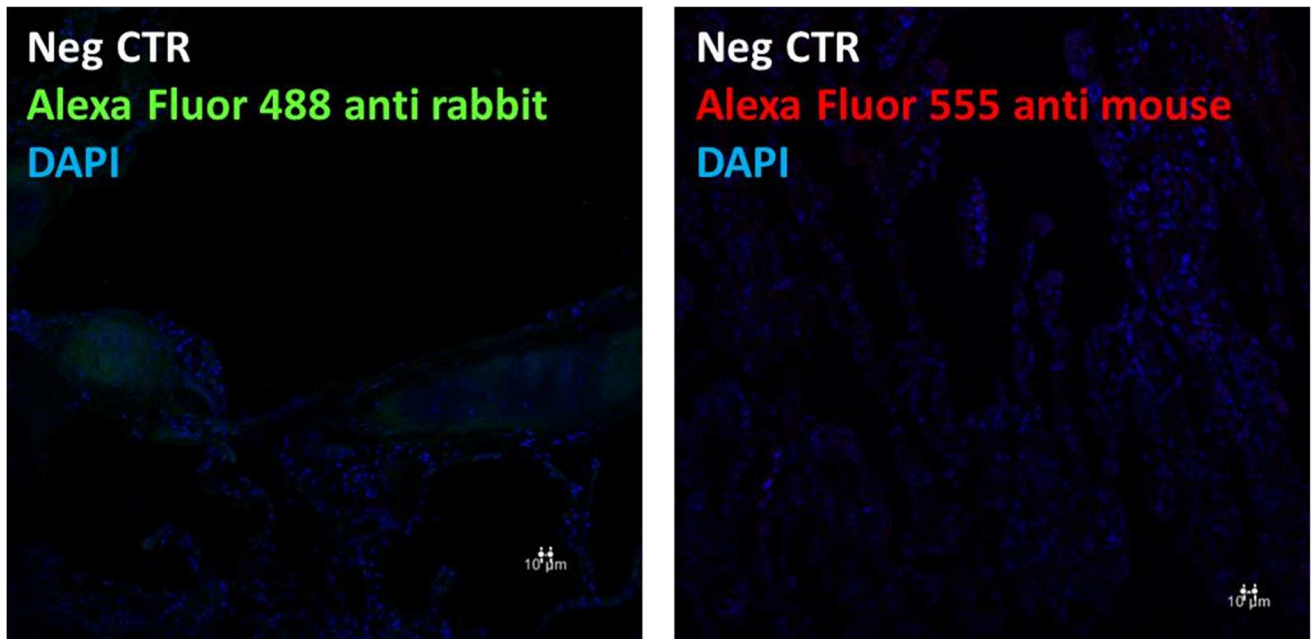

**Figure S1.** Immunofluorescence of negative control (Neg CTR) in lungs from *T. truncatus* and with donkey Alexa 488 or Alexa 555 conjugated secondary antibodies. DAPI (blue):4,6-diamidino-2-phenylindole. Scale bars, 10 µm.

**Table S2.** Samples tested for SARS-CoV 2 by IHC

### Legend

ID (case IHC) reference number of lung specimens analyzed by IHC (some also underwent PCR;  
\*specimens that underwent only IHC; Latitude/longitude refer to the geolocation coordinates of  
stranding sites

| Year | ID (case IHC) | SPECIE                | Long.   | Lat.     |
|------|---------------|-----------------------|---------|----------|
| 2020 | 1             | <i>T.truncatus</i>    | 9.10342 | 44.18731 |
|      | 2             | <i>S.coeruleoalba</i> | 8.27576 | 44.17631 |
|      | 3             | <i>S.coeruleoalba</i> | 8.27154 | 44.17352 |
|      | 4             | <i>S.coeruleoalba</i> | 8.24996 | 44.12117 |
|      | 5             | <i>Z. cavirostris</i> | 7.4602  | 43.4872  |
|      | 6             | <i>S.coeruleoalba</i> | 9.2346  | 44.1626  |
|      | 7             | <i>S.coeruleoalba</i> | 8.26881 | 44.15035 |
|      | 8             | <i>S.coeruleoalba</i> | 8.26057 | 39.16965 |
|      | 9             | <i>S.coeruleoalba</i> | 9.40432 | 39.45169 |
|      | 10            | <i>T.truncatus</i>    | 9.31353 | 41.2195  |

|      |     |                              |          |          |
|------|-----|------------------------------|----------|----------|
|      | 11  | <i>S.coeruleoalba</i>        | 8.2784   | 39.348   |
|      | 12  | <i>T.truncatus</i>           | 9.3108   | 41.1517  |
|      | 13  | <i>T.truncatus</i>           | 8.18597  | 40.34847 |
|      | 14  | <i>S.coeruleoalba</i>        | 8.26279  | 44.12455 |
|      | 15  | <i>S.coeruleoalba</i>        | 12.4069  | 37.33581 |
|      | 16  | <i>G. griseus</i>            | 15.1422  | 38.1386  |
|      | 17  | <i>T.truncatus</i>           | 12.4134  | 37.3372  |
|      | 18  | <i>S.coeruleoalba</i>        | 12.55937 | 38.1696  |
|      | 19  | <i>T.truncatus</i>           | 13.14505 | 38.114   |
|      | 20  | <i>S.coeruleoalba</i>        | 13.18666 | 37.22627 |
|      | 21  | <i>S.coeruleoalba</i>        | 15.1818  | 37.246   |
|      | 22  | <i>S.coeruleoalba</i>        | 13.33246 | 38.2933  |
|      | 23  | <i>S.coeruleoalba</i>        | 12.2552  | 37.4815  |
|      | 24  | <i>S.coeruleoalba</i>        | 14.58892 | 38.9023  |
|      | 44* | <i>S.coeruleoalba</i>        | 15.92121 | 38.68673 |
|      | 45* | <i>S.coeruleoalba</i>        | 14.3924  | 40.47324 |
|      | 46* | <i>S.coeruleoalba</i>        | 13.51668 | 40.43214 |
|      | 47* | <i>S.coeruleoalba</i>        | 14.42146 | 40.38789 |
|      | 48* | <i>S.coeruleoalba</i>        | 15.10666 | 38.9336  |
|      | 49* | <i>S.coeruleoalba</i>        | 13.24238 | 38.6017  |
|      | 50* | <i>S.coeruleoalba</i>        | 10.1038  | 42.4404  |
|      | 51* | <i>S.coeruleoalba</i>        | 10.13428 | 43.53571 |
|      | 52* | <i>S.coeruleoalba</i>        | 12.83074 | 41.41406 |
|      | 53* | <i>S.coeruleoalba</i>        | 10.26434 | 43.22239 |
|      | 54* | <i>S.coeruleoalba</i>        | 12.18349 | 41.43059 |
|      | 55* | <i>T.truncatus</i>           | 11.47904 | 42.5196  |
|      | 56* | <i>Balaenoptera physalus</i> | 14.225   | 40.3774  |
|      | 57* | <i>S.coeruleoalba</i>        | 15.19819 | 40.1076  |
|      | 58* | <i>S.coeruleoalba</i>        | 15.33574 | 40.4552  |
|      | 59* | <i>T.truncatus</i>           | 12.61943 | 41.44484 |
| 2021 | 25  | <i>S.coeruleoalba</i>        | 9.1345   | 44.20416 |

|      |    |                       |          |          |
|------|----|-----------------------|----------|----------|
|      | 26 | <i>S.coeruleoalba</i> | 7.36784  | 43.47191 |
|      | 27 | <i>S.coeruleoalba</i> | 8.689024 | 44.39423 |
|      | 28 | <i>T.truncatus</i>    | 9.102    | 44.186   |
|      | 29 | <i>S.coeruleoalba</i> | 13.24238 | 38.6017  |
|      | 30 | <i>S.coeruleoalba</i> | 12.5584  | 38.1676  |
|      | 31 | <i>S.coeruleoalba</i> | 12.55936 | 38.1695  |
|      | 32 | <i>S.coeruleoalba</i> | 13.32524 | 38.4638  |
|      | 33 | <i>D. delphis</i>     | 12.4188  | 37.3384  |
|      | 34 | <i>S.coeruleoalba</i> | 15.30515 | 38.17411 |
|      | 35 | <i>S.coeruleoalba</i> | 12.78526 | 37.58016 |
|      | 36 | <i>S.coeruleoalba</i> | 13.51327 | 37.59333 |
|      | 37 | <i>T.truncatus</i>    | 8.28059  | 44.17848 |
|      | 38 | <i>T.truncatus</i>    | 9.25493  | 44.15468 |
|      | 39 | <i>T.truncatus</i>    | 8.923392 | 44.41023 |
|      | 40 | <i>S.coeruleoalba</i> | 9.6232   | 44.22234 |
|      | 41 | <i>T.truncatus</i>    | 8.8383   | 43.56767 |
| 2022 | 42 | <i>T.truncatus</i>    | 8.029215 | 43.88192 |
|      | 43 | <i>T.truncatus</i>    | 8.125    | 43.52574 |

**Table S3.** ACE2 Immunohistochemical analysis of lung tissue from the Mediterranean Marine Mammal Tissue Bank (MMMTB), University of Padua (Legnaro, Padua, Italy).

| ID  | Species            | Sex    | Age      | Origin    | IHC ACE-2 |
|-----|--------------------|--------|----------|-----------|-----------|
| 2   | <i>T.truncatus</i> | Female | Adult    | Wild      | -         |
| 20  | <i>T.truncatus</i> | Female | Adult    | Captivity | ++        |
| 123 | <i>T.truncatus</i> | Female | Calf     | Captivity | ++        |
| 133 | <i>T.truncatus</i> | Female | Adult    | Captivity | ++        |
| 139 | <i>T.truncatus</i> | Male   | Adult    | Captivity | +         |
| 142 | <i>T.truncatus</i> | Female | Adult    | Wild      | +         |
| 144 | <i>T.truncatus</i> | Male   | Calf     | Captivity | +         |
| 145 | <i>T.truncatus</i> | Male   | Calf     | Captivity | ++        |
| 162 | <i>T.truncatus</i> | Male   | Calf     | Wild      | ++        |
| 190 | <i>T.truncatus</i> | Male   | Adult    | Wild      | +         |
| 201 | <i>T.truncatus</i> | Male   | Adult    | Wild      | -         |
| 312 | <i>T.truncatus</i> | Female | Juvenile | Wild      | ++        |
| 343 | <i>T.truncatus</i> | Female | Calf     | Captivity | ++        |
| 349 | <i>T.truncatus</i> | Female | Juvenile | Wild      | ++        |
| 359 | <i>T.Truncatus</i> | Female | Calf     | Captivity | -         |
| 493 | <i>T.truncatus</i> | Male   | Adult    | Captivity | ++        |

|     |                       |        |          |           |    |
|-----|-----------------------|--------|----------|-----------|----|
| 159 | <i>T.truncatus</i>    | Male   | Adult    | Captivity | +  |
| 6   | <i>S.coeruleoalba</i> | Male   | Adult    | Wild      | -  |
| 45  | <i>S.coeruleoalba</i> | Female | Adult    | Wild      | -  |
| 167 | <i>S.coeruleoalba</i> | Male   | Adult    | Wild      | ++ |
| 170 | <i>S.coeruleoalba</i> | Female | Adult    | Wild      | ++ |
| 255 | <i>S.coeruleoalba</i> | Female | Juvenile | Wild      | ++ |
| 263 | <i>S.coeruleoalba</i> | Female | Adult    | Wild      | ++ |
| 322 | <i>S.coeruleoalba</i> | Female | Juvenile | Wild      | -  |
| 341 | <i>S.coeruleoalba</i> | Male   | Juvenile | Wild      | -  |
| 353 | <i>S.coeruleoalba</i> | Female | Adult    | Wild      | +  |
| 355 | <i>S.coeruleoalba</i> | Female | Juvenile | Wild      | -  |
| 374 | <i>S.coeruleoalba</i> | Female | Calf     | Wild      | -  |
| 394 | <i>S.coeruleoalba</i> | Male   | Juvenile | Wild      | -  |
| 447 | <i>S.coeruleoalba</i> | Male   | Adult    | Wild      | -  |
| 454 | <i>S.coeruleoalba</i> | Male   | Juvenile | Wild      | +  |
| 479 | <i>S.coeruleoalba</i> | Male   | Calf     | Wild      | ++ |

**Legend of Results of ACE2 expression by IHC:** ++ Highly expressing sample; + Weakly expressing sample; - Negative

Sample analysed also by double IF

**Table S1.** ACE2 Immunohistochemical analysis of lung tissue from the Mediterranean Marine Mammal Tissue Bank (MMMTB), University of Padua (Legnaro, Padua, Italy).

| ID  | Species               | Sex    | Age      | Origin    | IHC ACE-2 |
|-----|-----------------------|--------|----------|-----------|-----------|
| 2   | <i>T.truncatus</i>    | Female | Adult    | Wild      | -         |
| 20  | <i>T.truncatus</i>    | Female | Adult    | Captivity | ++        |
| 123 | <i>T.truncatus</i>    | Female | Calf     | Captivity | ++        |
| 133 | <i>T.truncatus</i>    | Female | Adult    | Captivity | ++        |
| 139 | <i>T.truncatus</i>    | Male   | Adult    | Captivity | +         |
| 142 | <i>T.truncatus</i>    | Female | Adult    | Wild      | +         |
| 144 | <i>T.truncatus</i>    | Male   | Calf     | Captivity | +         |
| 145 | <i>T.truncatus</i>    | Male   | Calf     | Captivity | ++        |
| 162 | <i>T.truncatus</i>    | Male   | Calf     | Wild      | ++        |
| 190 | <i>T.truncatus</i>    | Male   | Adult    | Wild      | +         |
| 201 | <i>T.truncatus</i>    | Male   | Adult    | Wild      | -         |
| 312 | <i>T.truncatus</i>    | Female | Juvenile | Wild      | ++        |
| 343 | <i>T.truncatus</i>    | Female | Calf     | Captivity | ++        |
| 349 | <i>T.truncatus</i>    | Female | Juvenile | Wild      | ++        |
| 359 | <i>T.Truncatus</i>    | Female | Calf     | Captivity | -         |
| 493 | <i>T.truncatus</i>    | Male   | Adult    | Captivity | ++        |
| 159 | <i>T.truncatus</i>    | Male   | Adult    | Captivity | +         |
| 6   | <i>S.coeruleoalba</i> | Male   | Adult    | Wild      | -         |
| 45  | <i>S.coeruleoalba</i> | Female | Adult    | Wild      | -         |
| 167 | <i>S.coeruleoalba</i> | Male   | Adult    | Wild      | ++        |
| 170 | <i>S.coeruleoalba</i> | Female | Adult    | Wild      | ++        |
| 255 | <i>S.coeruleoalba</i> | Female | Juvenile | Wild      | ++        |
| 263 | <i>S.coeruleoalba</i> | Female | Adult    | Wild      | ++        |
| 322 | <i>S.coeruleoalba</i> | Female | Juvenile | Wild      | -         |
| 341 | <i>S.coeruleoalba</i> | Male   | Juvenile | Wild      | -         |

|     |                       |        |          |      |    |
|-----|-----------------------|--------|----------|------|----|
| 353 | <i>S.coeruleoalba</i> | Female | Adult    | Wild | +  |
| 355 | <i>S.coeruleoalba</i> | Female | Juvenile | Wild | -  |
| 374 | <i>S.coeruleoalba</i> | Female | Calf     | Wild | -  |
| 394 | <i>S.coeruleoalba</i> | Male   | Juvenile | Wild | -  |
| 447 | <i>S.coeruleoalba</i> | Male   | Adult    | Wild | -  |
| 454 | <i>S.coeruleoalba</i> | Male   | Juvenile | Wild | +  |
| 479 | <i>S.coeruleoalba</i> | Male   | Calf     | Wild | ++ |

**Legend of Results of ACE2 expression by IHC:** ++ Highly expressing sample; + Weakly expressing sample; - Negative sample.

Sample analysed also by double IF
